# Supplementary material for: Survival and Neurogenesis-Promoting Effects of the Co-Overexpression of BCLXL and BDNF Genes on Wharton’s Jelly-Derived Mesenchymal Stem Cells
Source: MDPI journal article supplement (doi:10.3390/life12091406), 2022-09-09
Supplement: s1 [file s1]

Detailed statistical analysis to Figure 6.

| BDNF                   |       |    |       |                          |          |
|------------------------|-------|----|-------|--------------------------|----------|
| ANOVA table            | SS    | DF | MS    | F (DFn, DFd)             | P value  |
| Time x Vector          | 41,27 | 8  | 5,159 | F (8, 36) = 21,04        | P<0,0001 |
| Time<br>(3/7/14/27/60) | 20,64 | 4  | 5,159 | F (1,254, 11,29) = 21,04 | P=0,0004 |
| Vector<br>(C/EV/FV)    | 236,5 | 2  | 118,3 | F (2, 9) = 160,7         | P<0,0001 |

| Post-hoc BDNF analysis (p value) |        |         |        |        |        |
|----------------------------------|--------|---------|--------|--------|--------|
|                                  | t=3    | t=7     | t=14   | t=27   | t=60   |
| C vs EV                          | X      | X       | X      | X      | X      |
| C vs FV                          | 0,0145 | <0,0001 | 0,0002 | 0,0133 | 0,0304 |
| EV vs FV                         | 0,0145 | <0,0001 | 0,0002 | 0,0133 | 0,0304 |

| BCL-XL                 |       |    |        |                          |          |
|------------------------|-------|----|--------|--------------------------|----------|
| ANOVA table            | SS    | DF | MS     | F (DFn, DFd)             | P value  |
| Time x Vector          | 1,942 | 8  | 0,2428 | F (8, 36) = 4,100        | P=0,0015 |
| Time<br>(3/7/14/27/60) | 2,914 | 4  | 0,7285 | F (1,082, 9,736) = 12,30 | P=0,0053 |
| Vector<br>(C/EV/FV)    | 5749  | 2  | 2875   | F (2, 9) = 19663         | P<0,0001 |

| Post-hoc BCL-XL analysis (p value) |         |         |         |         |         |
|------------------------------------|---------|---------|---------|---------|---------|
|                                    | t=3     | t=7     | t=14    | t=27    | t=60    |
| C vs EV                            | 0,6073  | 0,7242  | X       | X       | X       |
| C vs FV                            | <0,0001 | <0,0001 | <0,0001 | <0,0001 | <0,0001 |
| EV vs FV                           | <0,0001 | <0,0001 | <0,0001 | <0,0001 | <0,0001 |

| ANOVA table         | P value | P value summary | F (DFn, DFd)             |
|---------------------|---------|-----------------|--------------------------|
| Time (3/7/14/27/60) | 0,0540  | ns              | F (1,314, 7,558) = 4,862 |
| Vector (C/EV/FV)    | <0,0001 | ****            | F (2, 6) = 137,1         |
| Time x Vector       | 0,2383  | ns              | F (8, 23) = 1,427        |

| Post-hoc Share of positively transduced cells analysis (p value) |        |        |        |        |        |
|------------------------------------------------------------------|--------|--------|--------|--------|--------|
|                                                                  | t=3    | t=7    | t=14   | t=27   | t=60   |
| C vs EV                                                          | 0,0098 | 0,0265 | 0,0190 | 0,0768 | 0,0804 |
| C vs FV                                                          | 0,0098 | 0,0123 | 0,0081 | 0,0458 | 0,0455 |
| EV vs FV                                                         | 0,0150 | 0,0377 | 0,0065 | 0,0907 | 0,0604 |
